# Supplementary material
Source: publisher figshare collection journal article supplement (https://plos.figshare.com/articles/dataset/_/8049443)
Supplement: Supplementary file [file 1]

| <b>Year range</b> | <b>Significant heterophily</b> | <b>Significant homophily</b> | <b>Total n journals</b> |
|-------------------|--------------------------------|------------------------------|-------------------------|
| 2015-2016         | 2                              | 1472                         | 2116                    |
| 2005-2006         | 1                              | 391                          | 1192                    |
