# Supplementary material
Source: publisher figshare collection journal article supplement (https://plos.figshare.com/articles/dataset/_/8049443)
Supplement: Supplementary file [file 1]

| Quantity                             | 2005 - 2006 | 2015 - 2016 |
|--------------------------------------|-------------|-------------|
| Number of disciplines                | 101         | 107         |
| Number of journals                   | 1192        | 2116        |
| Number of papers                     | 151652      | 276879      |
| Number of authors                    | 647634      | 1311213     |
| Median number of papers per journal  | 87          | 87          |
| Median number of authors per journal | 371         | 413         |
| Median number of authors per paper   | 4           | 4           |
