# Supplementary material
Source: publisher figshare collection journal article supplement (https://plos.figshare.com/articles/dataset/_/8049443)

All authors

First authors

Last authors

 $\alpha' - \alpha$ 

0.10

0.05

0.00

2.0 2.5 3.0 3.5 4.0

Log10 sample size (number of papers)

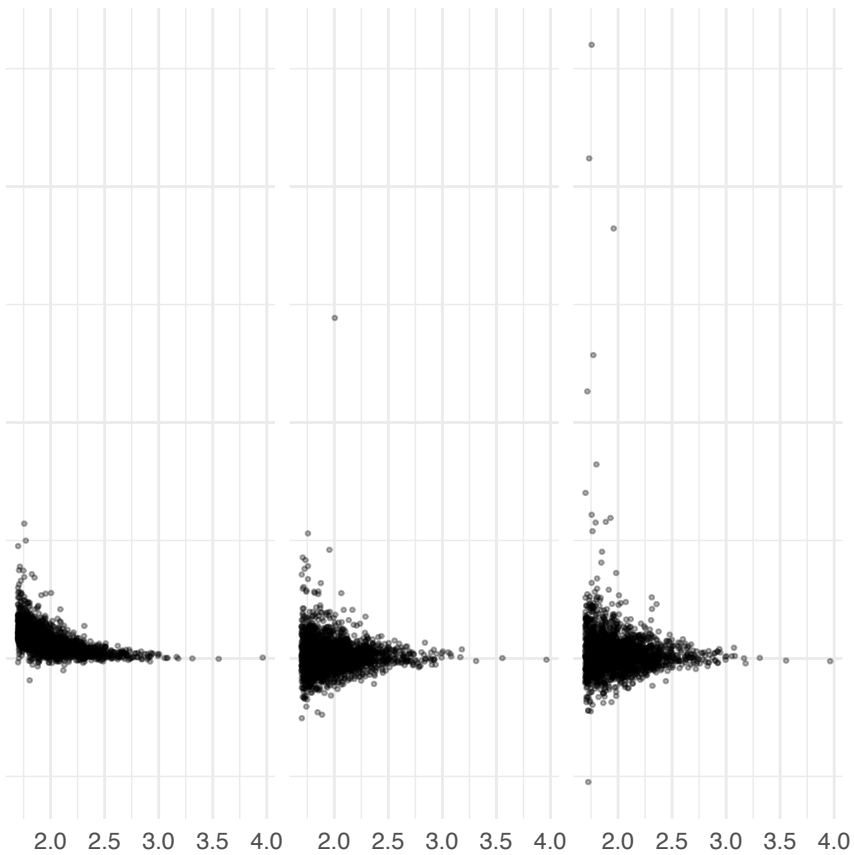

Supplement: Supplementary file [file 1]
