# Supplementary material
Source: publisher figshare collection journal article supplement (https://plos.figshare.com/articles/dataset/_/8049443)

Number of journals

60

40

20

0

-0.2

0.0

0.2

Change in  $\alpha'$  over the last ten years

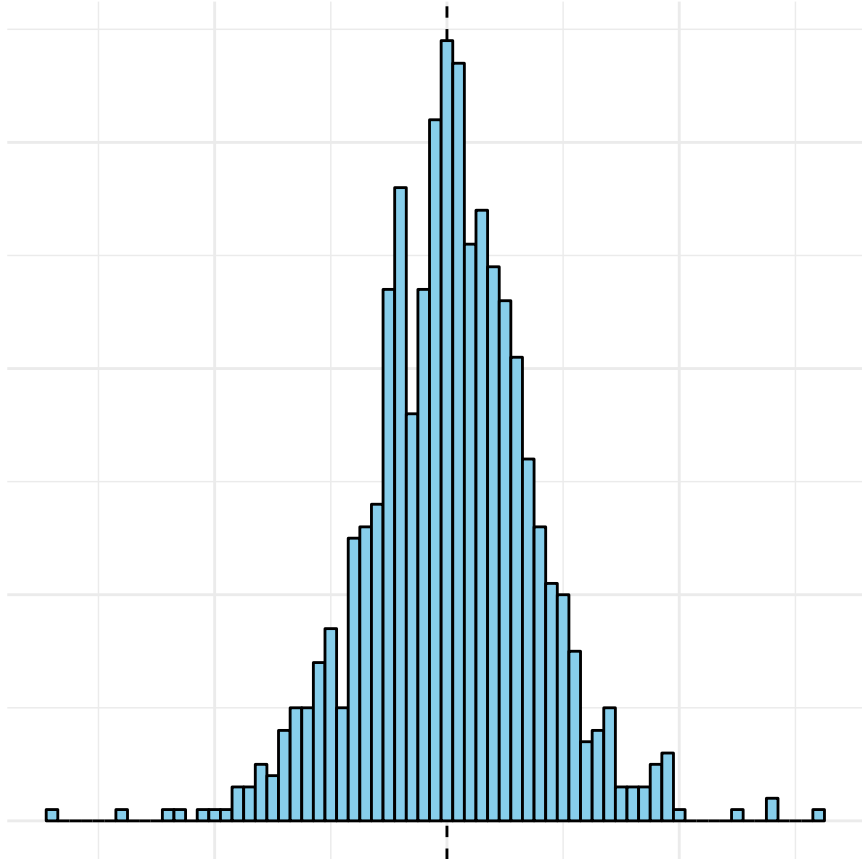

Supplement: Supplementary file [file 1]
